# Supplementary material
Source: publisher figshare collection journal article supplement (https://acs.figshare.com/ndownloader/files/3746911)
Supplement: Supplementary file 1 [file 3746911]

 
data_salpb261
 
_audit_creation_method            SHELXL-97
_chemical_name_systematic
;
 ?
;
_chemical_name_common             ?
_chemical_melting_point           ?
_chemical_formula_moiety          ?
_chemical_formula_sum
 'C20 H22 N2 O11 Pb'
_chemical_formula_weight          673.59
 
loop_
 _atom_type_symbol
 _atom_type_description
 _atom_type_scat_dispersion_real
 _atom_type_scat_dispersion_imag
 _atom_type_scat_source
 'C'  'C'   0.0033   0.0016
 'International Tables Vol C Tables 4.2.6.8 and 6.1.1.4'
 'H'  'H'   0.0000   0.0000
 'International Tables Vol C Tables 4.2.6.8 and 6.1.1.4'
 'O'  'O'   0.0106   0.0060
 'International Tables Vol C Tables 4.2.6.8 and 6.1.1.4'
 'Pb'  'Pb'  -3.3944  10.1111
 'International Tables Vol C Tables 4.2.6.8 and 6.1.1.4'
 'N'  'N'   0.0061   0.0033
 'International Tables Vol C Tables 4.2.6.8 and 6.1.1.4'
 
_symmetry_cell_setting            'monoclinic'
_symmetry_space_group_name_H-M    P2(1)/n
 
loop_
 _symmetry_equiv_pos_as_xyz
 'x, y, z'
 '-x+1/2, y+1/2, -z+1/2'
 '-x, -y, -z'
 'x-1/2, -y-1/2, z-1/2'
 
_cell_length_a                    12.8713(3)
_cell_length_b                    13.7355(4)
_cell_length_c                    12.8720(4)
_cell_angle_alpha                 90.0000(10)
_cell_angle_beta                  105.0910(10)
_cell_angle_gamma                 90.0000(10)
_cell_volume                      2197.21(11)
_cell_formula_units_Z             4
_cell_measurement_temperature     180(2)
_cell_measurement_reflns_used     9294
_cell_measurement_theta_min       2.99
_cell_measurement_theta_max       27.50
 
_exptl_crystal_description        'parallelepiped'
_exptl_crystal_colour             'colorless'
_exptl_crystal_size_max           0.35
_exptl_crystal_size_mid           0.27
_exptl_crystal_size_min           0.21
_exptl_crystal_density_meas       ?
_exptl_crystal_density_diffrn     2.036
_exptl_crystal_density_method     'not measured'
_exptl_crystal_F_000              1304
_exptl_absorpt_coefficient_mu     7.744
_exptl_absorpt_correction_type    'empirical'
_exptl_absorpt_correction_T_min   0.405
_exptl_absorpt_correction_T_max   1.000
_exptl_absorpt_process_details    'CrystalClear, Rigaku MSC, 2005'
 
_exptl_special_details
;
 ?
;
 
_diffrn_ambient_temperature       180(2)
_diffrn_radiation_wavelength      0.71073
_diffrn_radiation_type            MoK\a
_diffrn_radiation_source          'fine-focus sealed tube'
_diffrn_radiation_monochromator   graphite
_diffrn_measurement_device_type   'Rigaku R-AXIS SPIDER IPDS'
_diffrn_measurement_method        '\q scans'
_diffrn_detector_area_resol_mean  ?
_diffrn_standards_number          ?
_diffrn_standards_interval_count  ?
_diffrn_standards_interval_time   ?
_diffrn_standards_decay_%         ?
_diffrn_reflns_number             10022
_diffrn_reflns_av_R_equivalents   0.0297
_diffrn_reflns_av_sigmaI/netI     0.0328
_diffrn_reflns_limit_h_min        -12
_diffrn_reflns_limit_h_max        15
_diffrn_reflns_limit_k_min        -12
_diffrn_reflns_limit_k_max        16
_diffrn_reflns_limit_l_min        -15
_diffrn_reflns_limit_l_max        15
_diffrn_reflns_theta_min          3.00
_diffrn_reflns_theta_max          26.00
_reflns_number_total              4009
_reflns_number_gt                 3578
_reflns_threshold_expression      >2sigma(I)
 
_computing_data_collection        'CrystalClear, Rigaku MSC, 2005'
_computing_cell_refinement        'CrystalClear, Rigaku MSC, 2005'
_computing_data_reduction         'CrystalClear, Rigaku MSC, 2005'
_computing_structure_solution     'SHELXS-97 (Sheldrick, 1997)'
_computing_structure_refinement   'SHELXL-97 (Sheldrick, 1997)'
_computing_molecular_graphics     'DIAMOND (Brandenburg, 2012)'
_computing_publication_material   'WinGX (Farrugia, 1999)'
 
_refine_special_details
;
 Refinement of F^2^ against ALL reflections.  The weighted R-factor wR and
 goodness of fit S are based on F^2^, conventional R-factors R are based
 on F, with F set to zero for negative F^2^. The threshold expression of
 F^2^ > 2sigma(F^2^) is used only for calculating R-factors(gt) etc. and is
 not relevant to the choice of reflections for refinement.  R-factors based
 on F^2^ are statistically about twice as large as those based on F, and R-
 factors based on ALL data will be even larger.
;
 
_refine_ls_structure_factor_coef  Fsqd
_refine_ls_matrix_type            full
_refine_ls_weighting_scheme       calc
_refine_ls_weighting_details
 'calc w=1/[\s^2^(Fo^2^)+(0.0000P)^2^+4.9773P] where P=(Fo^2^+2Fc^2^)/3'
_atom_sites_solution_primary      direct
_atom_sites_solution_secondary    difmap
_atom_sites_solution_hydrogens    geom
_refine_ls_hydrogen_treatment     refall
_refine_ls_extinction_method      none
_refine_ls_extinction_coef        ?
_refine_ls_number_reflns          4009
_refine_ls_number_parameters      395
_refine_ls_number_restraints      0
_refine_ls_R_factor_all           0.0299
_refine_ls_R_factor_gt            0.0238
_refine_ls_wR_factor_ref          0.0452
_refine_ls_wR_factor_gt           0.0432
_refine_ls_goodness_of_fit_ref    1.080
_refine_ls_restrained_S_all       1.080
_refine_ls_shift/su_max           0.000
_refine_ls_shift/su_mean          0.000
 
loop_
 _atom_site_label
 _atom_site_type_symbol
 _atom_site_fract_x
 _atom_site_fract_y
 _atom_site_fract_z
 _atom_site_U_iso_or_equiv
 _atom_site_adp_type
 _atom_site_occupancy
 _atom_site_symmetry_multiplicity
 _atom_site_calc_flag
 _atom_site_refinement_flags
 _atom_site_disorder_assembly
 _atom_site_disorder_group
Pb Pb 0.083303(12) 0.234873(11) 0.799061(11) 0.01815(5) Uani 1 1 d . . .
O21 O 0.0520(2) 0.3133(2) 0.9765(2) 0.0232(6) Uani 1 1 d . . .
O22 O 0.1044(2) 0.4123(2) 0.86522(19) 0.0193(6) Uani 1 1 d . . .
O23 O 0.2670(3) 0.4428(3) 1.1094(2) 0.0289(8) Uani 1 1 d . . .
O24 O 0.2502(2) 0.4086(2) 1.2736(2) 0.0241(7) Uani 1 1 d . . .
O31 O 0.1335(2) 0.0853(2) 0.6726(2) 0.0306(8) Uani 1 1 d . . .
O32 O -0.0362(2) 0.1018(2) 0.6723(2) 0.0188(6) Uani 1 1 d . . .
O33 O 0.2022(2) -0.1964(2) 0.7226(2) 0.0293(7) Uani 1 1 d . . .
O34 O 0.0463(3) -0.1358(3) 0.7395(3) 0.0327(8) Uani 1 1 d . . .
N1 N 0.0459(3) 0.3130(2) 0.6154(2) 0.0204(8) Uani 1 1 d . . .
N2 N -0.1042(3) 0.3029(2) 0.7333(2) 0.0198(7) Uani 1 1 d . . .
C1 C 0.1174(4) 0.3144(3) 0.5578(3) 0.0291(10) Uani 1 1 d . . .
C2 C 0.0944(4) 0.3515(4) 0.4530(4) 0.0329(11) Uani 1 1 d . . .
C3 C -0.0059(4) 0.3866(4) 0.4077(4) 0.0330(12) Uani 1 1 d . . .
C4 C -0.0840(4) 0.3873(3) 0.4666(3) 0.0272(10) Uani 1 1 d . . .
C5 C -0.1902(4) 0.4269(4) 0.4257(4) 0.0336(12) Uani 1 1 d . . .
C6 C -0.2630(4) 0.4235(3) 0.4838(4) 0.0322(11) Uani 1 1 d . . .
C7 C -0.2364(3) 0.3812(3) 0.5892(3) 0.0245(10) Uani 1 1 d . . .
C8 C -0.3119(4) 0.3751(3) 0.6519(4) 0.0317(11) Uani 1 1 d . . .
C9 C -0.2820(3) 0.3341(3) 0.7510(4) 0.0288(10) Uani 1 1 d . . .
C10 C -0.1768(4) 0.2991(3) 0.7893(3) 0.0246(10) Uani 1 1 d . . .
C11 C -0.1327(3) 0.3436(3) 0.6333(3) 0.0219(9) Uani 1 1 d . . .
C12 C -0.0543(3) 0.3477(3) 0.5712(3) 0.0216(9) Uani 1 1 d . . .
C21 C 0.0743(3) 0.3966(3) 0.9501(3) 0.0138(8) Uani 1 1 d . . .
C22 C 0.0598(3) 0.4835(3) 1.0188(3) 0.0145(8) Uani 1 1 d . . .
C23 C 0.0940(3) 0.4561(3) 1.1385(3) 0.0176(9) Uani 1 1 d . . .
C24 C 0.2114(3) 0.4327(3) 1.1810(3) 0.0174(8) Uani 1 1 d . . .
C31 C 0.0371(3) 0.0594(3) 0.6408(3) 0.0173(8) Uani 1 1 d . . .
C32 C 0.0078(3) -0.0222(3) 0.5574(3) 0.0145(8) Uani 1 1 d . . .
C33 C 0.0966(4) -0.1008(3) 0.5789(3) 0.0182(9) Uani 1 1 d . . .
C34 C 0.1218(3) -0.1485(3) 0.6876(3) 0.0189(9) Uani 1 1 d . . .
OW1 O 0.0884(3) -0.2389(3) 0.9174(3) 0.0314(8) Uani 1 1 d . . .
OW2 O -0.0378(3) 0.1050(3) 0.9042(3) 0.0416(9) Uani 1 1 d . . .
OW3 O 0.1648(3) -0.3996(3) 0.8452(3) 0.0367(8) Uani 1 1 d . . .
HO23 H 0.326(5) 0.423(4) 1.133(5) 0.06(2) Uiso 1 1 d . . .
HO34 H 0.060(5) -0.162(5) 0.783(5) 0.06(2) Uiso 1 1 d . . .
HW1A H 0.053(5) -0.248(4) 0.945(4) 0.04(2) Uiso 1 1 d . . .
HW1B H 0.124(6) -0.294(6) 0.898(5) 0.10(3) Uiso 1 1 d . . .
HW2A H -0.051(5) 0.092(4) 0.957(5) 0.05(2) Uiso 1 1 d . . .
HW2B H -0.094(6) 0.092(6) 0.862(6) 0.11(3) Uiso 1 1 d . . .
HW3A H 0.229(5) -0.408(5) 0.853(4) 0.06(2) Uiso 1 1 d . . .
HW3B H 0.149(4) -0.469(4) 0.853(4) 0.050(16) Uiso 1 1 d . . .
H1 H 0.188(4) 0.291(3) 0.588(3) 0.030(12) Uiso 1 1 d . . .
H2 H 0.141(4) 0.351(4) 0.415(4) 0.046(16) Uiso 1 1 d . . .
H3 H -0.021(4) 0.413(3) 0.346(4) 0.036(14) Uiso 1 1 d . . .
H5 H -0.205(4) 0.452(3) 0.361(4) 0.036(14) Uiso 1 1 d . . .
H6 H -0.336(3) 0.454(3) 0.456(3) 0.025(12) Uiso 1 1 d . . .
H8 H -0.380(4) 0.402(3) 0.617(4) 0.036(13) Uiso 1 1 d . . .
H9 H -0.336(5) 0.324(4) 0.792(4) 0.059(17) Uiso 1 1 d . . .
H10 H -0.157(3) 0.272(3) 0.855(3) 0.017(11) Uiso 1 1 d . . .
H22 H 0.103(3) 0.536(3) 1.007(3) 0.012(10) Uiso 1 1 d . . .
H23A H 0.055(4) 0.402(4) 1.151(3) 0.031(13) Uiso 1 1 d . . .
H23B H 0.079(3) 0.508(3) 1.182(3) 0.020(11) Uiso 1 1 d . . .
H32 H -0.054(3) -0.055(3) 0.561(3) 0.015(10) Uiso 1 1 d . . .
H33A H 0.157(4) -0.076(3) 0.569(3) 0.029(13) Uiso 1 1 d . . .
H33B H 0.081(4) -0.161(4) 0.526(4) 0.044(14) Uiso 1 1 d . . .
 
loop_
 _atom_site_aniso_label
 _atom_site_aniso_U_11
 _atom_site_aniso_U_22
 _atom_site_aniso_U_33
 _atom_site_aniso_U_23
 _atom_site_aniso_U_13
 _atom_site_aniso_U_12
Pb 0.01730(8) 0.01892(8) 0.01642(7) -0.00569(6) 0.00117(5) 0.00298(7)
O21 0.0287(17) 0.0192(16) 0.0251(15) -0.0018(12) 0.0132(13) 0.0000(13)
O22 0.0211(15) 0.0225(16) 0.0162(13) -0.0032(11) 0.0081(11) 0.0014(12)
O23 0.0136(16) 0.052(2) 0.0211(15) 0.0080(14) 0.0045(13) 0.0112(16)
O24 0.0203(16) 0.0329(17) 0.0175(14) 0.0069(12) 0.0019(12) 0.0050(13)
O31 0.0129(16) 0.041(2) 0.0365(17) -0.0226(14) 0.0031(13) -0.0038(14)
O32 0.0111(14) 0.0242(16) 0.0217(14) -0.0095(11) 0.0051(11) -0.0018(12)
O33 0.0238(17) 0.0349(18) 0.0283(16) 0.0136(13) 0.0052(13) 0.0082(14)
O34 0.034(2) 0.043(2) 0.0252(18) 0.0137(16) 0.0152(15) 0.0135(16)
N1 0.0176(18) 0.0209(19) 0.0217(17) -0.0044(14) 0.0030(14) -0.0013(15)
N2 0.0194(18) 0.0161(17) 0.0240(17) -0.0052(13) 0.0060(14) -0.0021(15)
C1 0.026(3) 0.035(3) 0.027(2) -0.0055(19) 0.007(2) 0.003(2)
C2 0.034(3) 0.037(3) 0.031(2) -0.004(2) 0.014(2) -0.004(2)
C3 0.043(3) 0.035(3) 0.020(2) -0.0015(19) 0.005(2) -0.003(2)
C4 0.034(3) 0.022(2) 0.022(2) -0.0021(17) -0.0004(19) -0.004(2)
C5 0.037(3) 0.034(3) 0.022(2) 0.001(2) -0.007(2) 0.002(2)
C6 0.026(3) 0.033(3) 0.029(2) -0.004(2) -0.010(2) 0.004(2)
C7 0.019(2) 0.019(2) 0.031(2) -0.0048(17) -0.0006(18) -0.0053(18)
C8 0.022(3) 0.026(3) 0.041(3) -0.011(2) -0.001(2) 0.001(2)
C9 0.014(2) 0.031(3) 0.044(3) -0.004(2) 0.012(2) -0.005(2)
C10 0.023(2) 0.023(2) 0.028(2) -0.0035(18) 0.0074(19) -0.0014(19)
C11 0.019(2) 0.021(2) 0.022(2) -0.0094(16) 0.0014(17) -0.0030(18)
C12 0.023(2) 0.018(2) 0.022(2) -0.0071(16) 0.0010(17) -0.0033(18)
C21 0.0072(18) 0.017(2) 0.0166(18) -0.0013(15) 0.0026(15) 0.0039(16)
C22 0.013(2) 0.016(2) 0.0133(18) -0.0001(15) 0.0026(15) 0.0031(17)
C23 0.016(2) 0.024(2) 0.0129(19) -0.0008(16) 0.0038(16) 0.0013(19)
C24 0.017(2) 0.014(2) 0.021(2) -0.0029(15) 0.0037(17) 0.0004(17)
C31 0.020(2) 0.017(2) 0.0146(18) 0.0005(15) 0.0027(16) 0.0013(18)
C32 0.013(2) 0.019(2) 0.0111(18) -0.0014(15) 0.0017(15) -0.0028(17)
C33 0.020(2) 0.017(2) 0.0177(19) 0.0003(16) 0.0057(17) 0.0049(19)
C34 0.021(2) 0.015(2) 0.0189(19) -0.0007(16) 0.0027(17) -0.0045(18)
OW1 0.040(2) 0.029(2) 0.0287(17) 0.0064(14) 0.0156(16) -0.0002(17)
OW2 0.030(2) 0.056(3) 0.035(2) -0.0084(18) 0.0011(18) -0.0074(18)
OW3 0.029(2) 0.027(2) 0.064(2) 0.0101(16) 0.0281(18) 0.0022(17)
 
_geom_special_details
;
 All esds (except the esd in the dihedral angle between two l.s. planes)
 are estimated using the full covariance matrix.  The cell esds are taken
 into account individually in the estimation of esds in distances, angles
 and torsion angles; correlations between esds in cell parameters are only
 used when they are defined by crystal symmetry.  An approximate (isotropic)
 treatment of cell esds is used for estimating esds involving l.s. planes.
;
 
loop_
 _geom_bond_atom_site_label_1
 _geom_bond_atom_site_label_2
 _geom_bond_distance
 _geom_bond_site_symmetry_2
 _geom_bond_publ_flag
Pb N2 2.520(3) . ?
Pb N1 2.526(3) . ?
Pb O22 2.572(3) . ?
Pb O21 2.648(3) . ?
Pb O32 2.657(3) . ?
O21 C21 1.249(5) . ?
O22 C21 1.269(4) . ?
O23 C24 1.312(5) . ?
O23 HO23 0.79(6) . ?
O24 C24 1.213(4) . ?
O31 C31 1.253(5) . ?
O32 C31 1.262(5) . ?
O33 C34 1.210(5) . ?
O34 C34 1.326(5) . ?
O34 HO34 0.65(6) . ?
N1 C1 1.324(6) . ?
N1 C12 1.354(5) . ?
N2 C10 1.321(5) . ?
N2 C11 1.363(5) . ?
C1 C2 1.399(6) . ?
C1 H1 0.94(5) . ?
C2 C3 1.359(7) . ?
C2 H2 0.87(5) . ?
C3 C4 1.408(7) . ?
C3 H3 0.85(5) . ?
C4 C12 1.409(5) . ?
C4 C5 1.438(7) . ?
C5 C6 1.343(7) . ?
C5 H5 0.88(4) . ?
C6 C7 1.433(6) . ?
C6 H6 1.00(4) . ?
C7 C11 1.406(6) . ?
C7 C8 1.417(7) . ?
C8 C9 1.355(7) . ?
C8 H8 0.95(5) . ?
C9 C10 1.399(6) . ?
C9 H9 0.99(6) . ?
C10 H10 0.90(4) . ?
C11 C12 1.443(6) . ?
C21 C22 1.526(5) . ?
C22 C23 1.534(5) . ?
C22 C22 1.557(7) 3_567 ?
C22 H22 0.95(4) . ?
C23 C24 1.502(5) . ?
C23 H23A 0.93(5) . ?
C23 H23B 0.95(4) . ?
C31 C32 1.531(5) . ?
C32 C33 1.544(5) . ?
C32 C32 1.563(7) 3_556 ?
C32 H32 0.92(4) . ?
C33 C34 1.502(5) . ?
C33 H33A 0.89(5) . ?
C33 H33B 1.06(5) . ?
OW1 HW1A 0.65(6) . ?
OW1 HW1B 0.95(8) . ?
OW2 HW2A 0.76(6) . ?
OW2 HW2B 0.80(8) . ?
OW3 HW3A 0.81(6) . ?
OW3 HW3B 0.99(6) . ?
 
loop_
 _geom_angle_atom_site_label_1
 _geom_angle_atom_site_label_2
 _geom_angle_atom_site_label_3
 _geom_angle
 _geom_angle_site_symmetry_1
 _geom_angle_site_symmetry_3
 _geom_angle_publ_flag
N2 Pb N1 66.16(11) . . ?
N2 Pb O22 76.66(9) . . ?
N1 Pb O22 83.40(9) . . ?
N2 Pb O21 77.97(9) . . ?
N1 Pb O21 126.83(10) . . ?
O22 Pb O21 49.91(8) . . ?
N2 Pb O32 72.44(9) . . ?
N1 Pb O32 77.24(9) . . ?
O22 Pb O32 148.13(8) . . ?
O21 Pb O32 127.98(8) . . ?
C21 O21 Pb 92.4(2) . . ?
C21 O22 Pb 95.5(2) . . ?
C24 O23 HO23 110(4) . . ?
C31 O32 Pb 98.8(2) . . ?
C34 O34 HO34 107(6) . . ?
C1 N1 C12 119.0(4) . . ?
C1 N1 Pb 122.6(3) . . ?
C12 N1 Pb 118.1(3) . . ?
C10 N2 C11 118.4(4) . . ?
C10 N2 Pb 123.7(3) . . ?
C11 N2 Pb 117.9(3) . . ?
N1 C1 C2 122.8(4) . . ?
N1 C1 H1 120(3) . . ?
C2 C1 H1 117(3) . . ?
C3 C2 C1 118.8(5) . . ?
C3 C2 H2 119(3) . . ?
C1 C2 H2 122(3) . . ?
C2 C3 C4 120.2(4) . . ?
C2 C3 H3 121(3) . . ?
C4 C3 H3 119(3) . . ?
C3 C4 C12 117.2(4) . . ?
C3 C4 C5 123.3(4) . . ?
C12 C4 C5 119.4(4) . . ?
C6 C5 C4 121.2(4) . . ?
C6 C5 H5 122(3) . . ?
C4 C5 H5 117(3) . . ?
C5 C6 C7 120.8(4) . . ?
C5 C6 H6 121(2) . . ?
C7 C6 H6 119(2) . . ?
C11 C7 C8 117.9(4) . . ?
C11 C7 C6 119.9(4) . . ?
C8 C7 C6 122.2(4) . . ?
C9 C8 C7 119.4(4) . . ?
C9 C8 H8 127(3) . . ?
C7 C8 H8 113(3) . . ?
C8 C9 C10 119.0(4) . . ?
C8 C9 H9 120(3) . . ?
C10 C9 H9 121(3) . . ?
N2 C10 C9 123.5(4) . . ?
N2 C10 H10 118(3) . . ?
C9 C10 H10 119(3) . . ?
N2 C11 C7 121.8(4) . . ?
N2 C11 C12 118.9(4) . . ?
C7 C11 C12 119.3(4) . . ?
N1 C12 C4 121.9(4) . . ?
N1 C12 C11 118.7(4) . . ?
C4 C12 C11 119.3(4) . . ?
O21 C21 O22 122.2(3) . . ?
O21 C21 C22 119.2(3) . . ?
O22 C21 C22 118.5(3) . . ?
C21 C22 C23 110.1(3) . . ?
C21 C22 C22 107.9(4) . 3_567 ?
C23 C22 C22 112.7(4) . 3_567 ?
C21 C22 H22 109(2) . . ?
C23 C22 H22 109(2) . . ?
C22 C22 H22 108(2) 3_567 . ?
C24 C23 C22 114.6(3) . . ?
C24 C23 H23A 107(3) . . ?
C22 C23 H23A 110(3) . . ?
C24 C23 H23B 106(2) . . ?
C22 C23 H23B 111(2) . . ?
H23A C23 H23B 107(4) . . ?
O24 C24 O23 124.0(4) . . ?
O24 C24 C23 122.3(4) . . ?
O23 C24 C23 113.7(3) . . ?
O31 C31 O32 121.6(4) . . ?
O31 C31 C32 118.7(4) . . ?
O32 C31 C32 119.7(4) . . ?
C31 C32 C33 110.5(3) . . ?
C31 C32 C32 108.9(4) . 3_556 ?
C33 C32 C32 110.4(4) . 3_556 ?
C31 C32 H32 112(2) . . ?
C33 C32 H32 105(3) . . ?
C32 C32 H32 110(2) 3_556 . ?
C34 C33 C32 116.2(3) . . ?
C34 C33 H33A 109(3) . . ?
C32 C33 H33A 110(3) . . ?
C34 C33 H33B 103(3) . . ?
C32 C33 H33B 115(3) . . ?
H33A C33 H33B 103(4) . . ?
O33 C34 O34 123.5(4) . . ?
O33 C34 C33 122.7(4) . . ?
O34 C34 C33 113.8(4) . . ?
HW1A OW1 HW1B 116(7) . . ?
HW2A OW2 HW2B 101(7) . . ?
HW3A OW3 HW3B 95(5) . . ?
 
_diffrn_measured_fraction_theta_max    0.930
_diffrn_reflns_theta_full              25.00
_diffrn_measured_fraction_theta_full   0.927
_refine_diff_density_max    0.768
_refine_diff_density_min   -0.625
_refine_diff_density_rms    0.109
